# Supplementary material for: Current State of Geospatial Methodologic Approaches in Canadian Population Oncology Research
Source: Oxford University Press journal article supplement (doi:10.1158/1055-9965.epi-20-0092), 2020-04-16
Supplement: 10559965epi200092-sup-235863_2_supp_6197913_q8hsr1.docx [file 10559965epi200092-sup-235863_2_supp_6197913_q8hsr1.docx]

**Supplementary Table S1.** Data sources used in addition to cancer registries for population oncology geospatial research in Canada.

| **Data Sources** | **Counts*** | **Studies from this literature review** |
| --- | --- | --- |
| Census Canada | 44 | Ghazawi et al. (2019) [81];  Ghazawi et al. (2019) [80];  Chan et al. (2019) [36];  Le et al. (2019) [82];  Darwich et al. (2019) [78];  Ghazawi et al. (2019) [79];  Ghazawi et al. (2019) [46];  Lagace et al. (2019) [58];  Ghazawi et al. (2018) [83];  Saint-Jacques et al. (2018) [21];  Dawe et al. (2017)[14];  Ghazawi et al. (2017) [18];  Singh et al. (2017) [22];  Walker et al. (2017) [40];  Ye et al. (2017) [47];  Pinault et al. (2017) [59];  Brown et al. (2016) [23];  Saint-Jacques et al. (2016) [24];  Auluck et al. (2016) [60];  Trinh et al. (2016) [61];  Torabi et al. (2015) [25];  Walker et al. (2015) [84];  Labine et al. (2015) [62];  Torabi et al. (2014) [26];  Jiang et al. (2014) [27];  Auluck et al. (2014) [64];  Lofters et al. (2013) [49];  Hwang et al. (2013) [66];  Luginaah et al. (2012) [16];  Milewski (2012) [50];  Holowaty et al. (2010) [31];  Yiannakoulias (2009) [54];  Groome et al. (2008) [44];  Zhang-Salomons et al. (2006) [70];  Borugian et al. (2005) [71];  Gorey et al. (2003) [72];  Gorey et al. (2000) [73];  Mackillop et al. (2000) [74];  Van Leeuwen et al. (1999) [33]  Boyd et al. (1999) [75];  Paszat et al. (1998) [45]  Goel et al. (1997) [76];  Gorey et al. (1997) [70];  Walter (1992) [34] |
| Environment Canada and Provincial/Territorial Government’s Environment Departments | 9 | Pinault et al. (2017) [59];  Saint-Jacques et al. (2016) [24];  Li et al. (2016) [48];  Winters et al (2015) [63];  Hystad et al. (2013) [65];  Hystad et al. (2013) [28];  Hystad et al. (2012) [17];  Anderson et al. (2011) [69];  Pan et al. (2011) [68]; |
| Desktop Machine Technologies Conversion File | 9 | Tabaczynski et al. (2020) [57];  Le et al. (2019) [82];  Saint-Jacques et al. (2016) [24];  Trinh et al. (2016) [61]  Winters et al (2015) [63];  Labine et al. (2015) [62];  Hystad et al. (2013) [65];  Hystad et al. (2012) [17];  Pan et al. (2011) [68] |
| Mailed-in Survey | 8 | Tabaczynski et al. (2020) [57];  Trinh et al. (2016) [61];  Winters et al (2015) [63];  Hystad et al. (2013) [65];  Hystad et al. (2013) [28];  Hystad et al. (2012) [17]  Anderson et al. (2011) [69];  Pan et al. (2011) [68] |
| Postal Code Conversion File Plus | 7 | Saint-Jacques et al. (2018) [21];  Pinault et al. (2017) [59];  Hwang et al. (2013) [66];  Hystad et al. (2013) [28];  Helewa et al. (2013) [43];  Holowaty et al. (2010) [31];  Borugian et al. (2005) [71] |
| Provincial health insurance client file | 5 | Ye et al. (2017) [47];  Lofters et al. (2013) [49];  Hystad et al. (2013) [65];  Hystad et al. (2013) [28];  Pan et al. (2011) [68] |
| Provincial Statistics Department | 4 | McCrate et al. (2018) [38];  Winters et al (2015) [63];  Jiang et al. (2014) [27];  Kulkarni et al. (2011) [51] |
| Government health and Environmental Surveys** | 3 | Labine et al. (2015) [62];  Chen et al. (2008) [32];  Van Leeuwen et al. (1999) [33] |
| Surveillance, Epidemiology and End Results data | 3 | Gorey et al. (2000) [73];  Mackillop et al. (2000) [74];  Gorey et al. (1997) [70] |
| Discharge Abstract Database | 2 | McCrate et al. (2018) [38];  Lofters et al. (2013) [49] |
| Medical charts | 2 | Ahmed et al. (2019) [35];  Helewa et al. (2013) [43] |
| Vital Statistics | 2 | Le et al. (2019) [82];  Jiang et al. (2014) [27] |
| Physician claim data | 1 | Lofters et al. (2013) [49] |
| Provincial screening database | 1 | Lofters et al. (2013) [49] |
| Canadian Census Health and Environment Cohort | 1 | Pinault et al. (2017) [59] |
| Cancer in Young People in Canada Registry | 1 | Larouche et al. (2020) [77] |
| Directory of Radiotherapy centres | 1 | Chan et al. (2019) [36] |

* Studies often used multiple data sources and the total of counts do not add to 25.

** Includes the Census of Agriculture, Canadian Community Health Surveyk Ontario Drinking Water Surveillance Program, Ontario Farm Groundwater Quality Survey, and Survey of Pesticide Use in Ontario, Ontario Health Survey.
